# Supplementary material for: Pressure-induced structural changes and elemental dissociation of cadmium and mercury chalcogenides
Source: Royal Society of Chemistry journal article supplement (doi:10.1039/c5ra21673g), 2015-01-01
Supplement: c5ra21673g1.pdf [file c5ra21673g1.pdf]

## Pressure-induced structural changes and elemental dissociation of cadmium and mercury chalcogenides

Yan Yan<sup>a,b</sup>, Shoutao Zhang<sup>a</sup>, Yanchao Wang<sup>a,\*</sup>, Guochun Yang<sup>a,c,\*</sup>, and Yanming Ma<sup>a</sup>

<sup>a</sup> State Key Laboratory of Superhard Materials, Jilin University, Changchun 130012, P. R. China.

<sup>b</sup> School of Sciences, Changchun University, Changchun 130022, P. R. China.

<sup>c</sup> Faculty of Chemistry, Northeast Normal University, Changchun 130024, P. R. China.

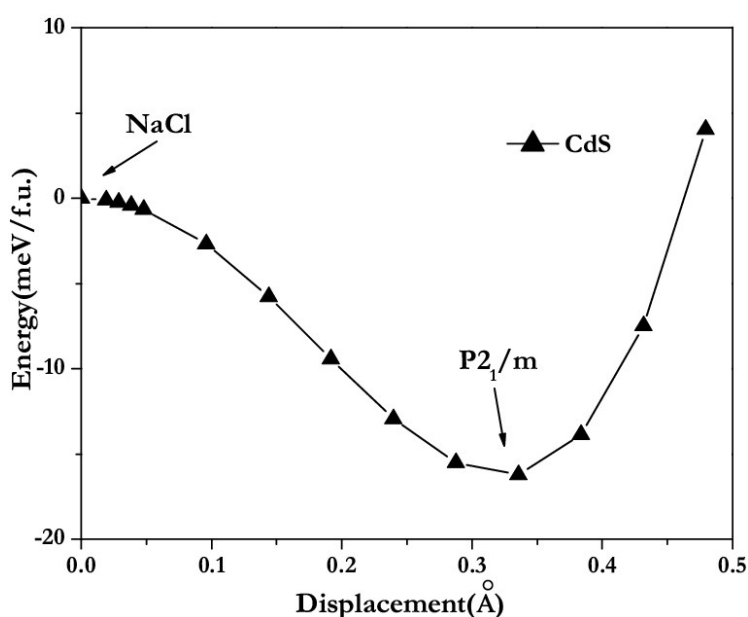

**Figure S1.** The corresponding energy evolution related to phase transitions of  $NaCl \rightarrow P2_1/m$  CdS with the relevant atom displacement (see Figure 2b).

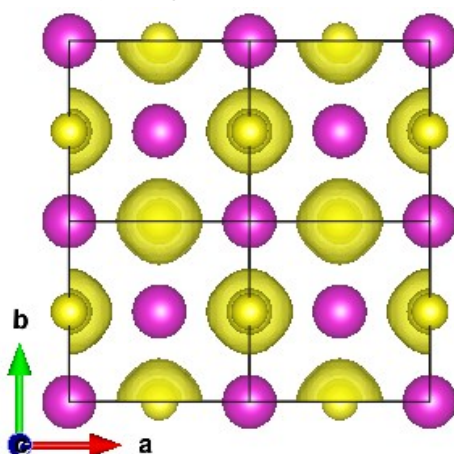

**Figure S2.** The calculated electron localization functions (ELF) of tetragonal  $P4/nmm$  ( $Z = 2$ ) phase for CdS at 120 GPa. The isosurface value is set as 0.75. The S atoms are small and yellow and the Cd atoms are large and pink.

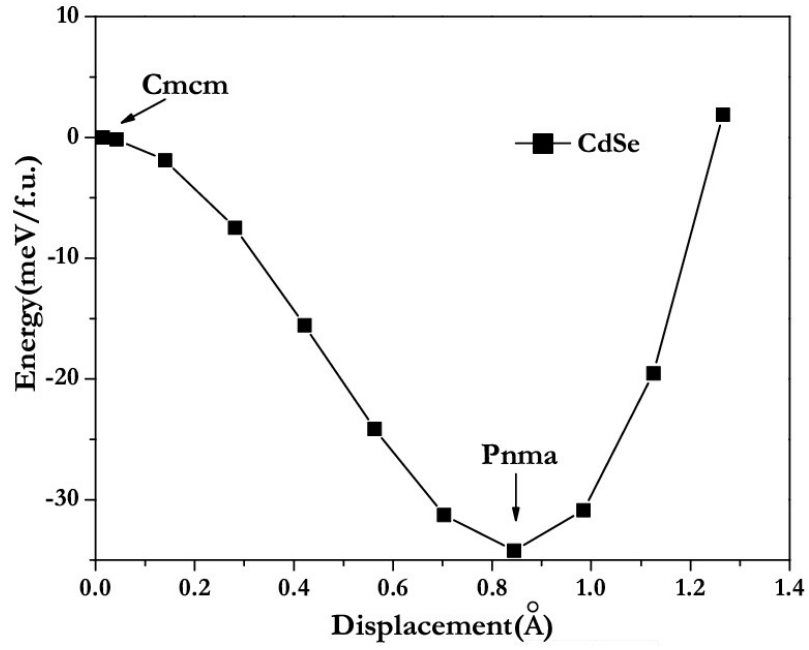

**Figure S3.** The corresponding energy evolution related to phase transitions of  $Cmcm \rightarrow Pnma$  CdSe with the relevant atom displacement (see Figure 2d).

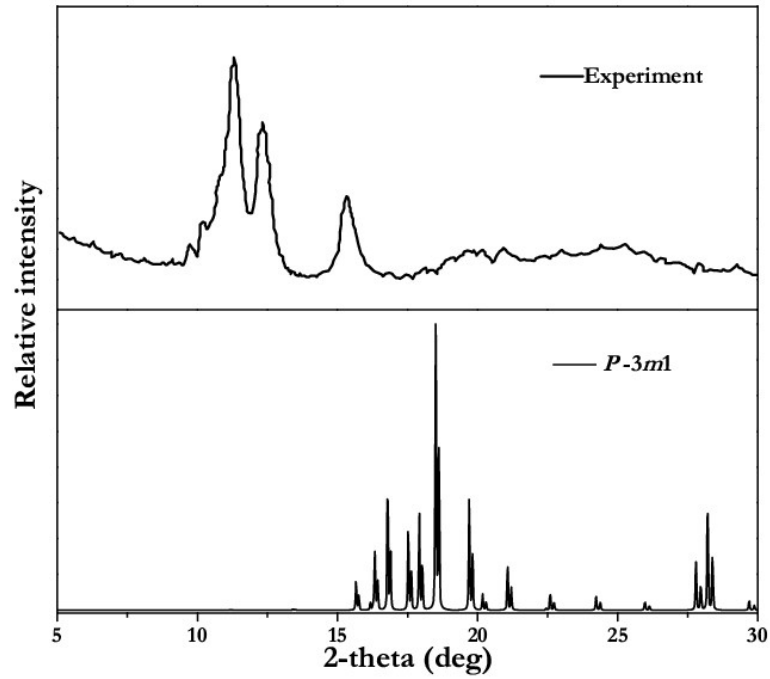

**Figure S4.** The simulated x-ray diffraction patterns for the metastable  $P-3m1$  phase of CdTe compared with the experimental data for the unresolved phase at 55 GPa.
